# Supplementary material
Source: publisher figshare collection journal article supplement (https://karger.figshare.com/ndownloader/files/30842905)
Supplement: Supplementary file 1 [file 30842905]

**Table 2S (online suppl.):** Exception Codes in Perfusion Index analysis with minimum of 30 readings (=1 minute)

| Classified as high Signal Quality | | Classified as low Signal Quality | |
| --- | --- | --- | --- |
| Number of Readings | Exception Code | Number of Readings | Exception Code |
| 1844457 | 000004000000 | 146418 | 000006000000 |
| 456 | 000004200000 | 74 | 000006200000 |
| 280 | 000004000020 |
| 101 | 000004000029 |
| 101 | 00000400002D |
| 38 | 000004000020 |
